# Supplementary material for: Profiling of Short-Tandem-Repeat Disease Alleles in 12,632 Human Whole Genomes
Source: PubMed Central journal article supplement — Am J Hum Genet. 2017 Nov 2;101(5):700–15. doi: 10.1016/j.ajhg.2017.09.013 (PMC5673627; doi:10.1016/j.ajhg.2017.09.013), 2017-11-02
Supplement: mmc1.pdf [file mmc1.pdf]

**The American Journal of Human Genetics, Volume 101**

**Supplemental Data**

**Profiling of Short-Tandem-Repeat Disease Alleles  
in 12,632 Human Whole Genomes**

**Haibao Tang, Ewen F. Kirkness, Christoph Lippert, William H. Biggs, Martin Fabani, Ernesto Guzman, Smriti Ramakrishnan, Victor Lavrenko, Boyko Kakaradov, Claire Hou, Barry Hicks, David Heckerman, Franz J. Och, C. Thomas Caskey, J. Craig Venter, and Amalio Telenti**

Supplementary figures (9 total)

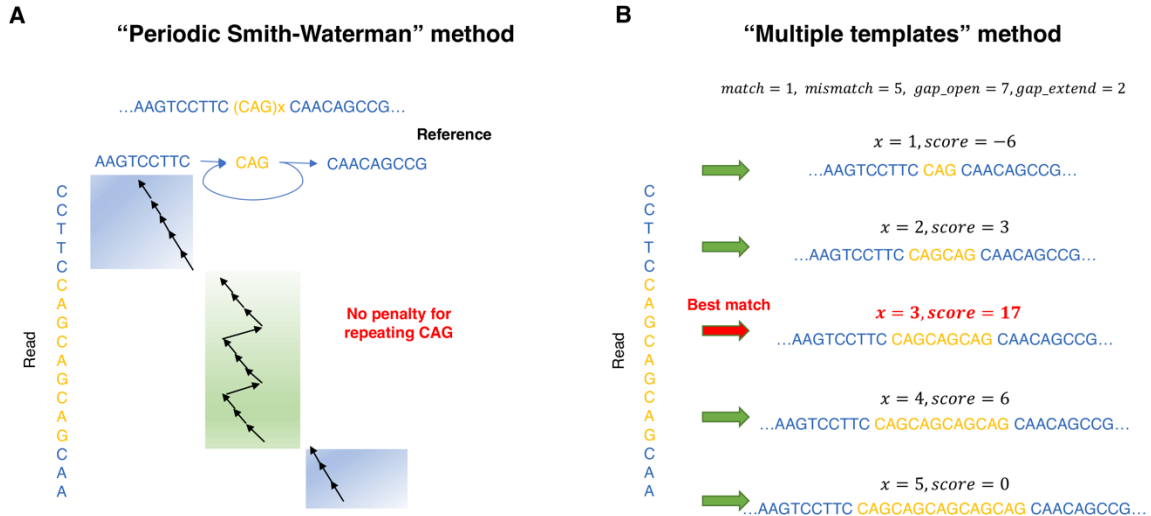

**Figure S1. Comparison of two sequence alignment methods exploiting the periodicity of the STR sequences.** (A) “Periodic Smith-Waterman” method modifies the recurrence table when performing the dynamic programming step so that repeat units are not penalized during matching; (B) “Multiple templates” method aligns read to a series of templates embedded with varying number of repeats, using standard SW alignment with a fixed scoring scheme. The alignment yields a series of alignments with different scores which are then compared to determine the repeat size that corresponds to the highest score. “Multiple templates” method is the selected alignment method in TREDPARSE.

**A**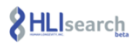

SHORT TANDEM REPEATS ARE A COMMON SOURCE OF GENETIC DISEASES THAT CAN BE ASSAYED THROUGH GENOME SEQUENCING

[FIND OUT HOW](#)

INTERACTIVE STR SERVER (PUBLIC)

BAM file

1001\_HD.bam

BAM file can be on FTP or S3 on human reference hg38 hg19

Examples: HD case DM1 case SCA17 case AR case

STR locus

| ALS                                                              | AR                                                                    | BPES                                                                  |
|------------------------------------------------------------------|-----------------------------------------------------------------------|-----------------------------------------------------------------------|
| Amyotrophic lateral sclerosis, or spinal frontotemporal dementia | Susceptibility to prostate cancer due to Androgen Receptor expression | Blepharophimosis, epicanthic inversion, and ptosis                    |
| CCD                                                              | CHHS                                                                  | DM1                                                                   |
| Cleidocranial dysplasia                                          | Central hypomyelination syndrome                                      | Myotonic dystrophy 1                                                  |
| FRAAXE                                                           | FRDA                                                                  | FXS                                                                   |
| Mental retardation, FRAAXE type                                  | Friedreich ataxia                                                     | Fragile X syndrome                                                    |
| HFG                                                              | HPES                                                                  | OPMD                                                                  |
| Hand-foot-oral syndrome                                          | Hypomyelination-hypomyelination                                       | Oculopharyngeal muscular dystrophy                                    |
| SCA12                                                            | SCA17                                                                 | SCA2                                                                  |
| Spinocerebellar ataxia 12                                        | Spinocerebellar ataxia 17                                             | Spinocerebellar ataxia 2                                              |
| SCA8                                                             | SDS                                                                   | ULD                                                                   |
| Spinocerebellar ataxia 8                                         | Syndactyly                                                            | Epilepsy, progressive myoclonic 1A/Unverricht-Landborg Disease        |
|                                                                  |                                                                       | XLMR                                                                  |
|                                                                  |                                                                       | Mental retardation, X-linked, with isolated growth hormone deficiency |

**B**

HD alleles: 15 / 41 CAGs

95% Credible Interval: 15-15 / 41-54 CAGs

Disease status: risk -  $Prob(disease)=1$

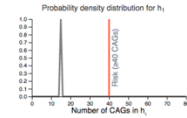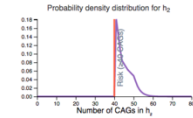

Full spanning - 4 reads

Partial spanning - 9 reads

Repeat-only - 0 reads

Paired end - 13 pairs

HD (Huntington disease)

Gene HTT (chr4:3074509-3243959+ on hg38) - coding region

Inheritance Autosomal dominant

Sequence GAGTCCTCAGTCTCTC  
CAG<sub>x</sub>  
CAACAGCCGCCCGCCG  
x=19 in hg38

Symptom Huntington's disease (HD) is a neurodegenerative genetic disorder that affects muscle coordination and leads to mental decline and behavioral symptoms. HD is one of several trinucleotide repeat disorders which are caused by the length of a repeated section of a gene exceeding a normal range.

OMIM wikipedia

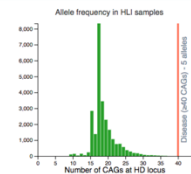

**Figure S2. An interactive server for computing the STR calls. (A)** Input includes the BAM location, reference genome version and the STR locus of interest. **(B)** Output includes detailed information about the STR – including call results, posterior probability density of the size of risk alleles, and various types of reads affecting the final calls.

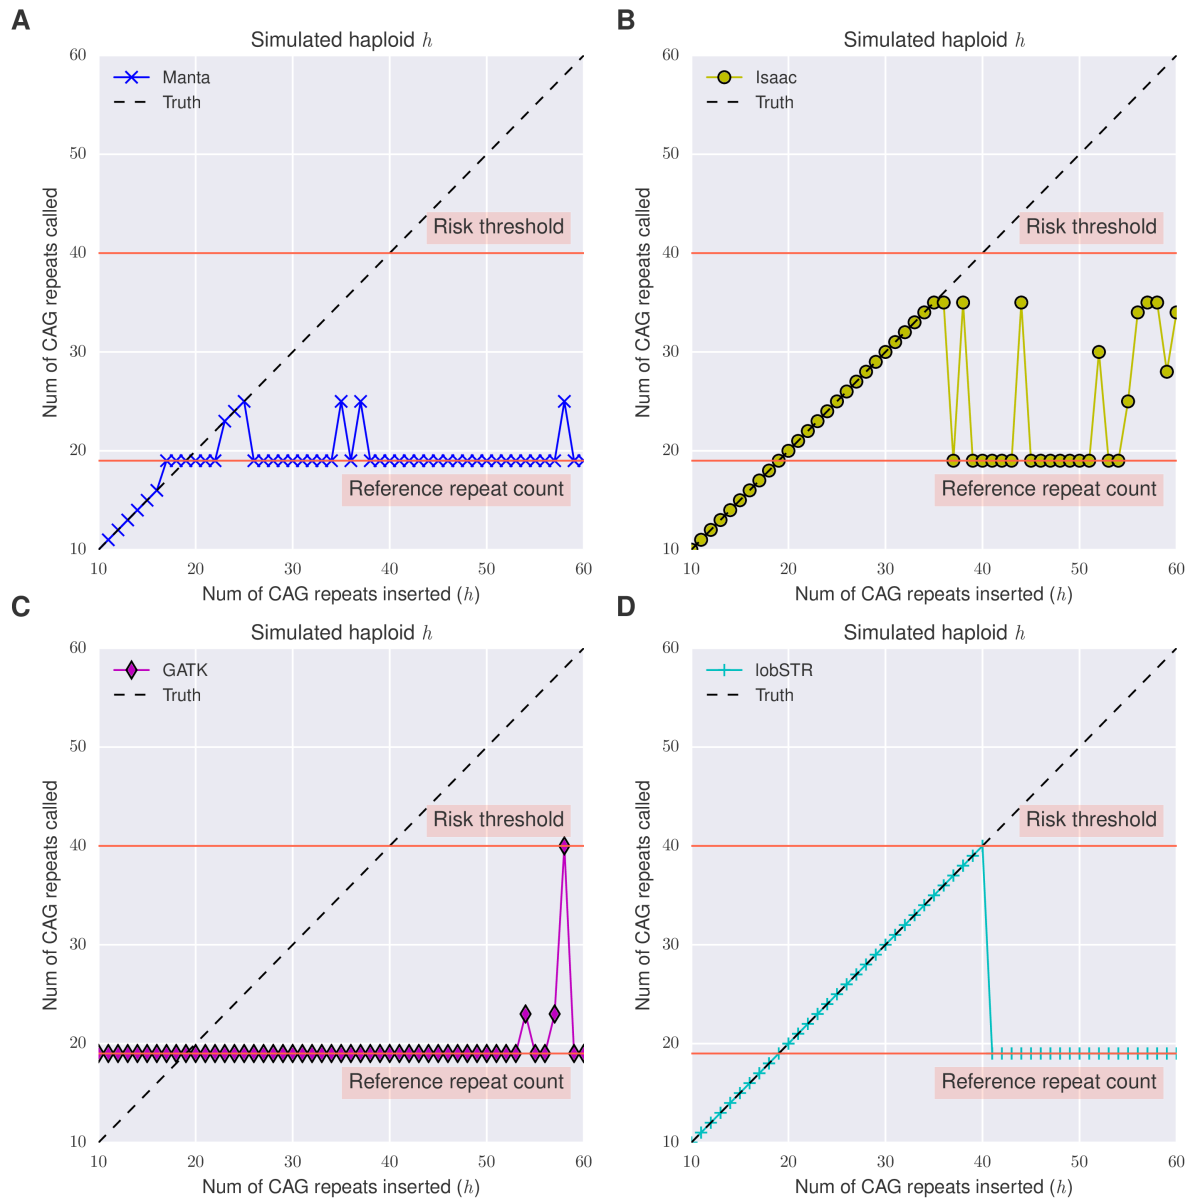

**Figure S3. Simulations with synthetic datasets of implanted STR alleles at Huntington (HD) locus.** We have tested performance of several variant callers, including (A) Manta (B) Isaac (C) GATK, (D) lobSTR.

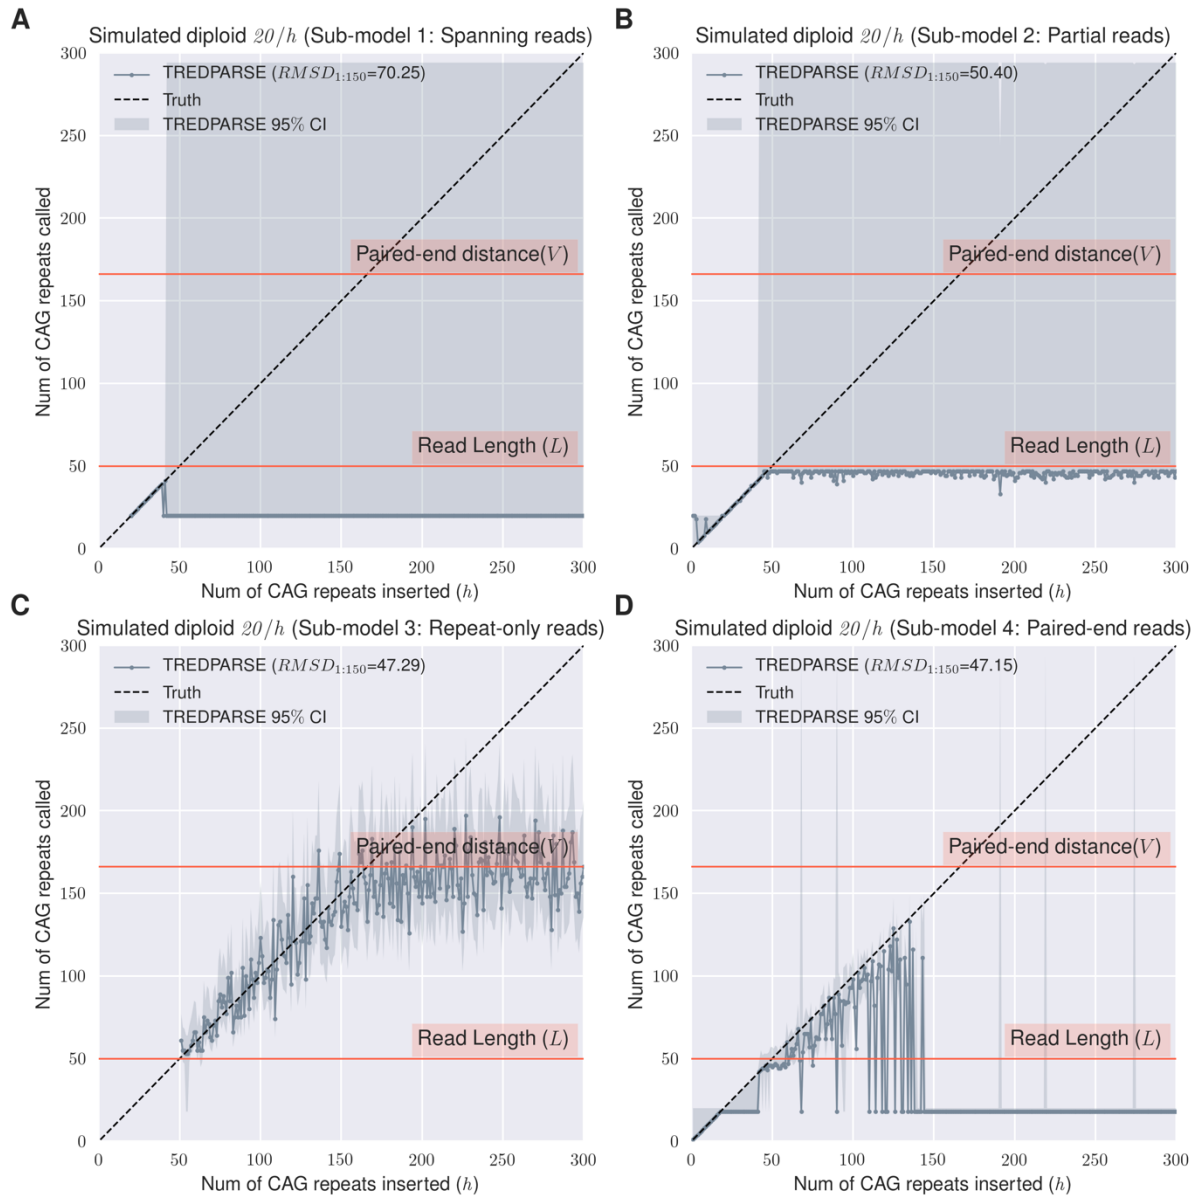

**Figure S4. Predictive power of each of the four types of evidence.** Each type of evidence has their own specific predictive range. In this simulation, TREDPARSE is run **(A)** using only spanning reads; **(B)** using only partial reads; **(C)** using only repeat reads; **(D)** using only paired-end distance. Shaded region represents 95% credible interval for TREDPARSE estimates of  $h$ .  $RMSD$  represents root-mean-square deviation, calculated as  $RMSD = \frac{1}{N} \sqrt{\sum_{i=1:N} (h_i - \hat{h}_i)^2}$ , where  $N = 150$ .

$$RMSD = \frac{1}{N} \sqrt{\sum_{i=1:N} (h_i - \hat{h}_i)^2}, \text{ where } N = 150.$$

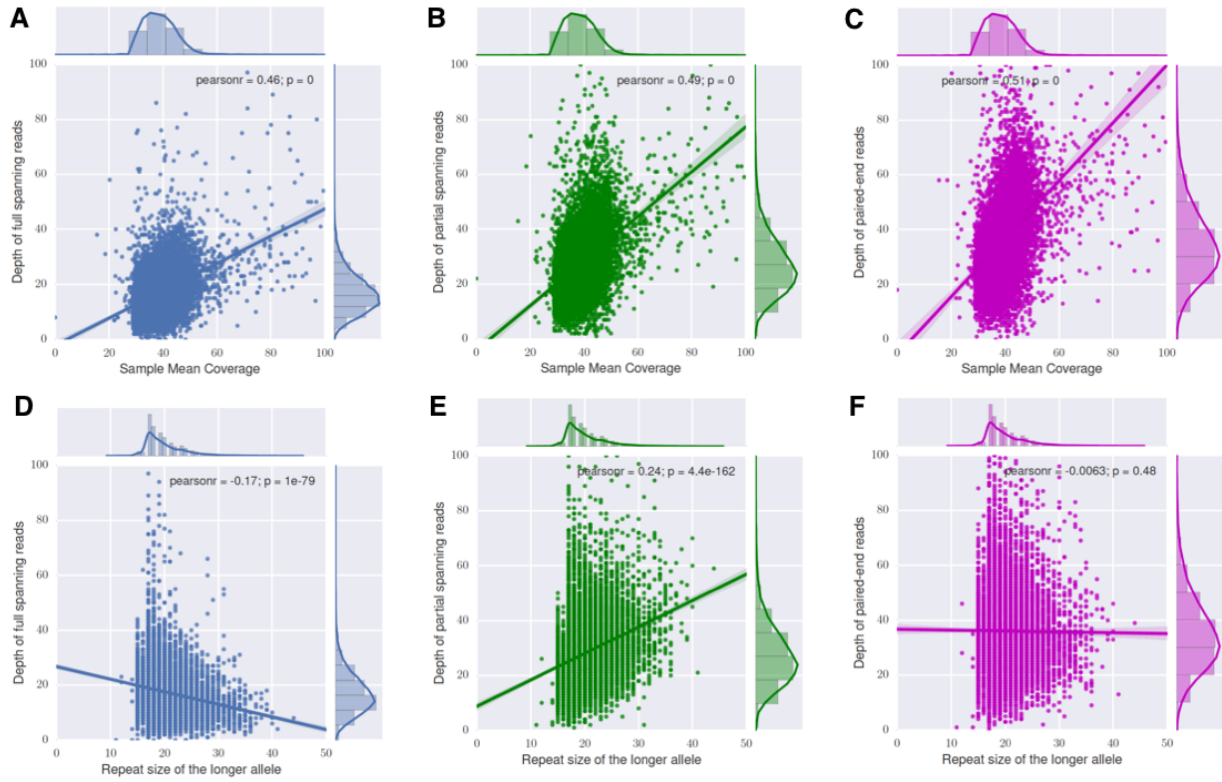

**Figure S5. Amount of evidence as a function of sample read depth coverage and length of the repeat allele at Huntington (HD) locus.** Based on our HLI samples, relationships are shown between sample mean coverage and depth of (A) spanning reads, (B) partial reads, (C) spanning pairs, as well as the repeat units of the longer allele and read depth of (D) spanning reads, (E) partial reads, (F) spanning pairs.

**A**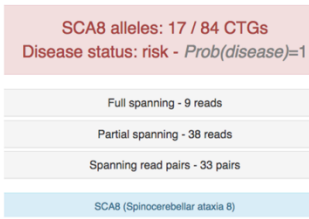

**TREDPARSE** at SCA8  
Call 17/84

**B**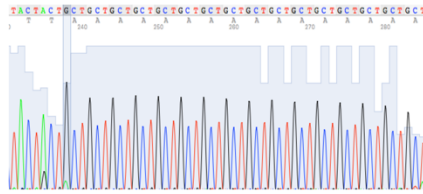

**Sanger** identifies only one allele  
Call 17/17

**C**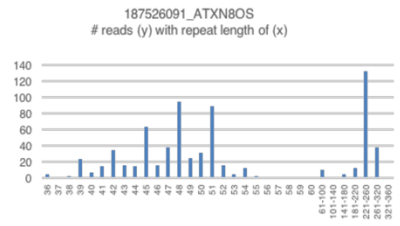

**ONP** confirms the longer allele  
predicted by **TREDPARSE**

**Figure S6. Example of validation of TREDPARSE calls using Sanger and Oxford Nanopore sequencing.** In this example, there is disagreement between **(A)** TREDPARSE call (two alleles 17 and 84) and **(B)** Sanger sequencing which identified only the allele with size 17. **(C)** Oxford Nanopore sequencing confirms the longer allele, showing two peaks of allele sizes that both match the prediction of TREDPARSE. Sample mean coverage of the input BAM is  $33\times$ .

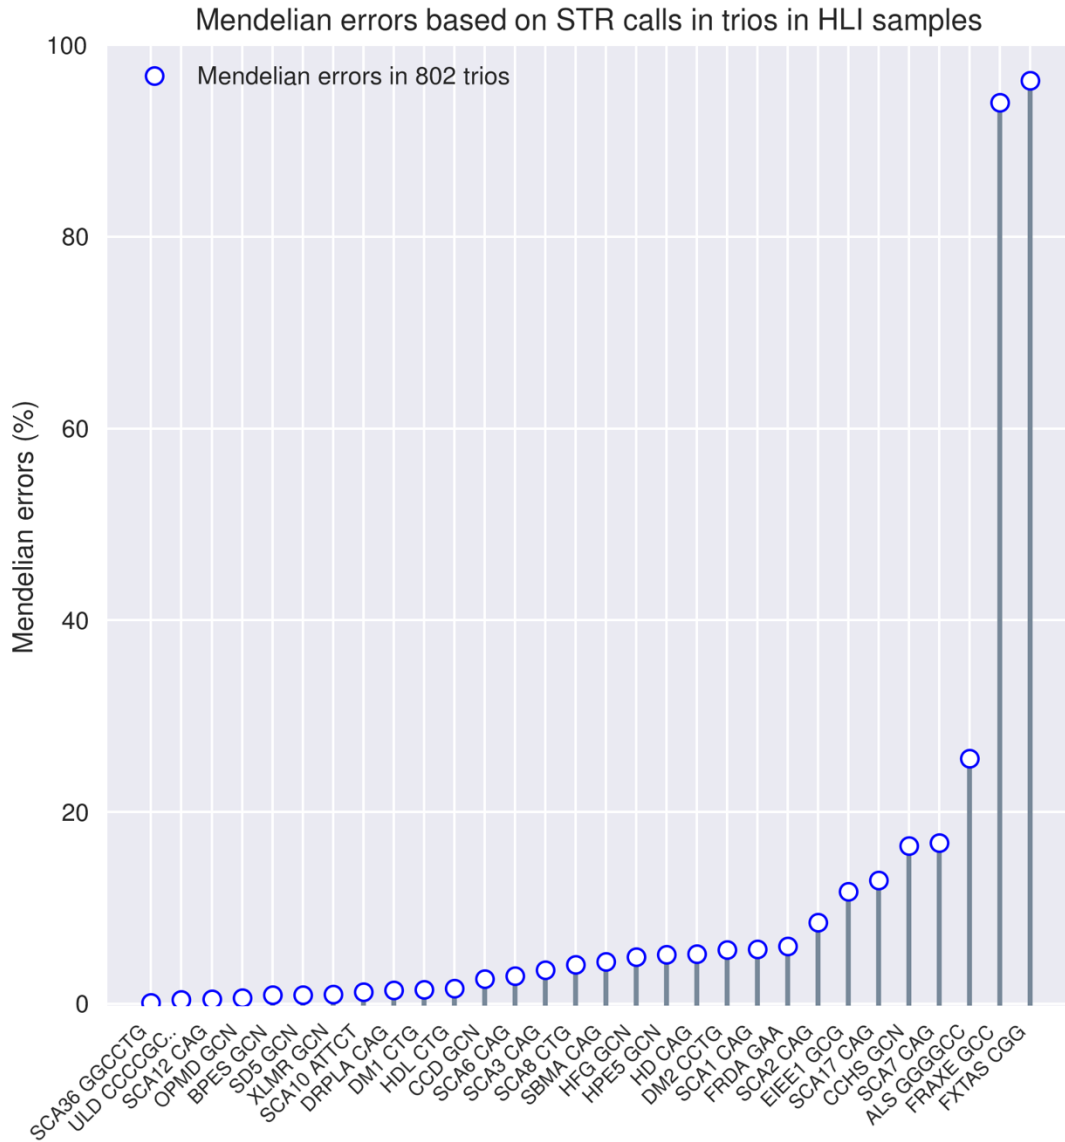

**Figure S7. Mendelian errors based on trios and duos in HLI samples.** For each of the 802 trio families in HLI samples, a Mendelian error was called if the child alleles are improbable given the parent alleles. The error rate was calculated as the number of families containing a Mendelian error divided by the total number of families that have all three individuals called by TREDPARSE.



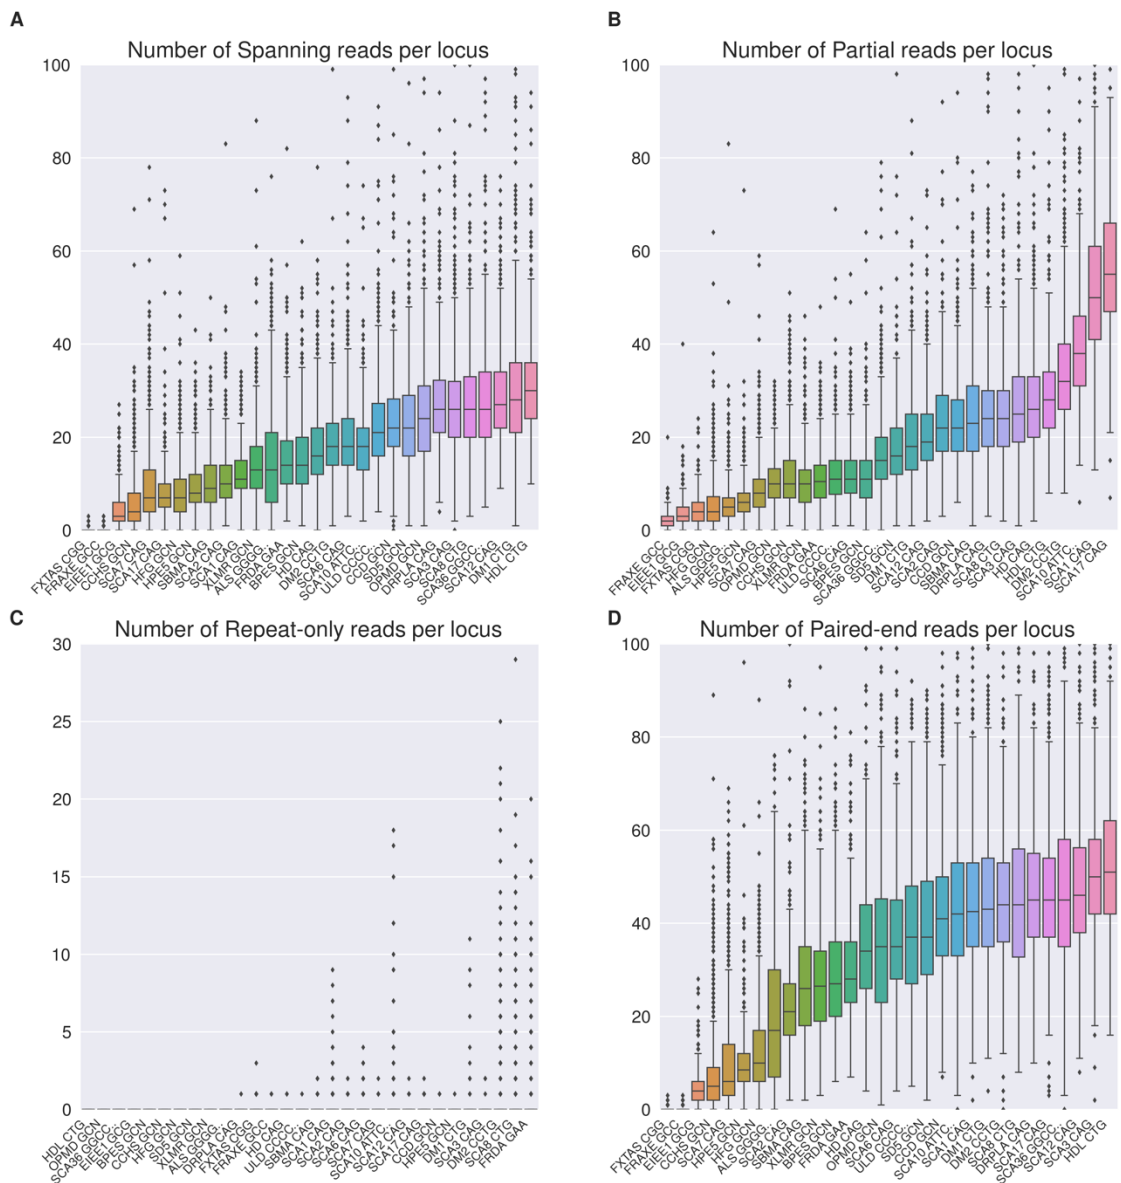

**Figure S8. Box plot of amount of read evidence across 30 TRED loci in HLI samples.** We plot the distribution of number of reads at each locus, for all read types – including **(A)** spanning reads; **(B)** partial reads; **(C)** repeat-only reads; **(D)** paired-end reads. Box shows the inter-quartile (IQR) range, with bar in the middle indicating median values. Outliers are shown in dots outside the IQR range. In the repeat-only reads panel (C), the box plot is not visible due to zero counts of the repeat-only reads for most loci in most individuals.

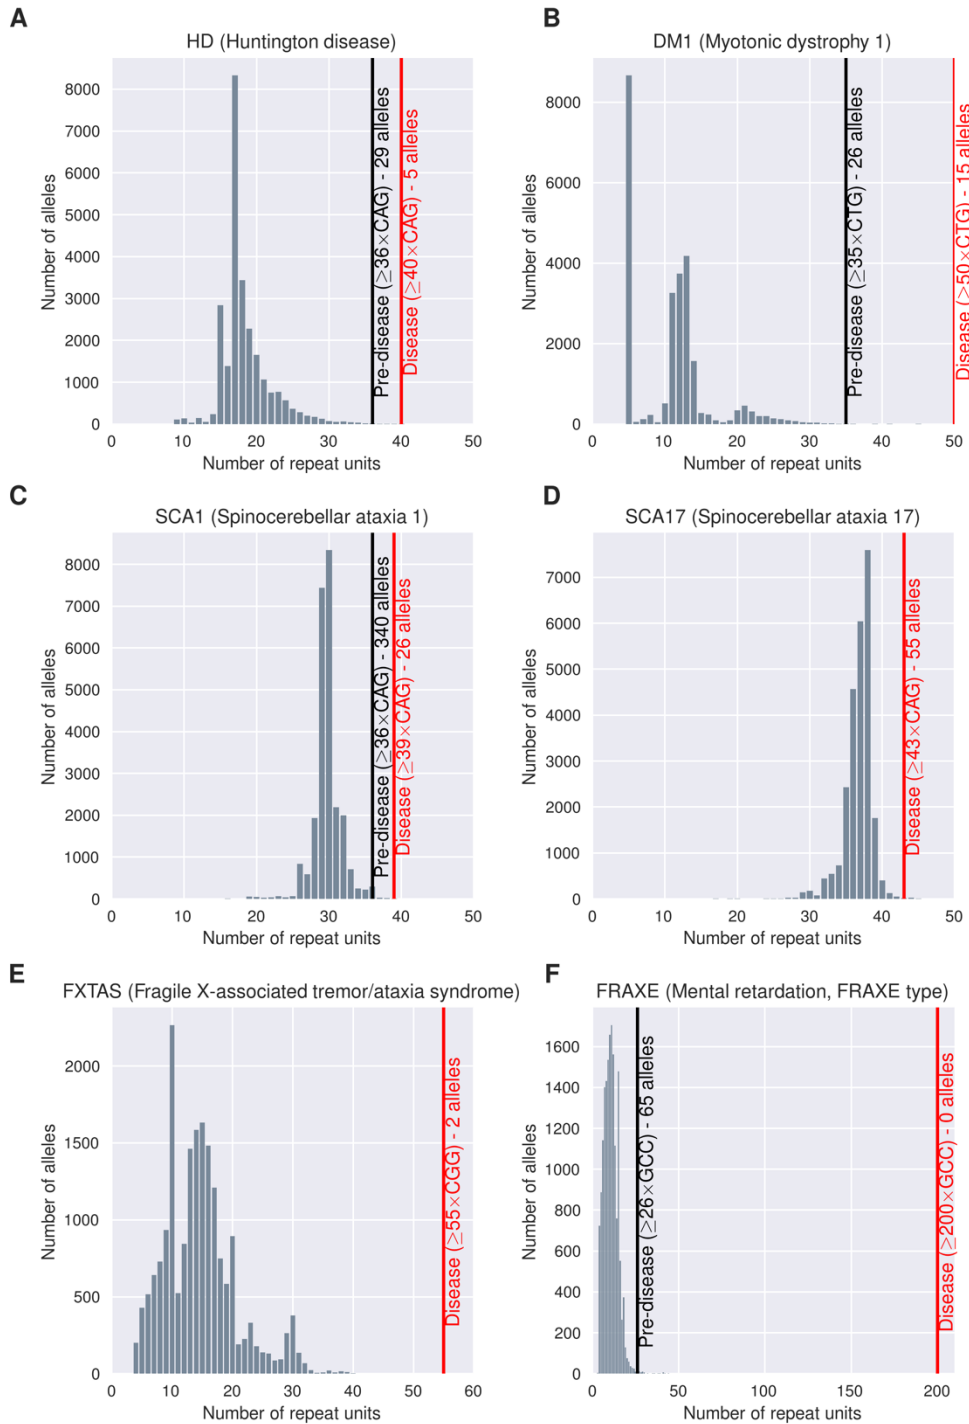

**Figure S9. Allele frequencies within the whole genome samples at selected STR loci.** Selected STR loci (A-F) include Huntington’s disease (HD), Myotonic dystrophy (DM1), Spinocerebellar Ataxia Type 1 (SCA1), Spinocerebellar Ataxia Type 17 (SCA17), Fragile X-associated tremor/ataxia syndrome (FXTAS) and Mental retardation, FRAXE type (FRAXE).

**Supplementary tables (5 total)**

**Table S1. STR disease prevalence in HLI samples when compared to the known prevalence estimates based on literature review.**

[See EXCEL file [Table-S1.xlsx](#)]

**Table S2. Number of spanning, partial, repeat-only and paired-end reads identified by TREDPARSE for each of the 138 individuals with risk alleles.**

[See EXCEL file [Table-S2.xlsx](#)]

**Table S3. Validation of TREDPARSE using 6 cell line samples from the Genetic Testing Reference Materials Coordination Program (GeT-RM).** lobSTR was run with parameters `--max-diff-ref 150 --realign --noise\_model illumina\_v3.pcrfree`. TREDPARSE was run with parameter `--useclippedreads`.

| Sample ID | Disorder                                                                       | Truth          | lobSTR  | Expansion-Hunter | TREDPARSE | TREDPARSE status                          |
|-----------|--------------------------------------------------------------------------------|----------------|---------|------------------|-----------|-------------------------------------------|
| NA05164   | [DM1] - Myotonic dystrophy 1                                                   | 21/340         | 11/21   | 56/63            | 21/74     | short allele matches,<br>long allele -266 |
| NA06075   | [DM1] - Myotonic dystrophy 1                                                   | 12/66          | 12/12   | 12/38            | 12/64     | short allele matches,<br>long allele -2   |
| NA20236   | [FXTAS/FXS] - Fragile X-associated tremor/ataxia syndrome / Fragile X syndrome | 31/53          | NO CALL | 16/18            | 18/145    | no matches                                |
| NA20239   | [FXTAS/FXS] - Fragile X-associated tremor/ataxia syndrome / Fragile X syndrome | 20/183<br>-193 | NO CALL | 20/22            | 20/163    | short allele matches,<br>long allele -20  |
| NA20250   | [HD] - Huntington disease                                                      | 15/40          | 15/18   | 15/45            | 15/40     | both alleles match                        |
| NA20252   | [HD] - Huntington disease                                                      | 22/66          | 22/22   | 22/55            | 22/59     | short allele matches,<br>long allele -7   |

**Table S4. Validation of samples with risk alleles by CLIA Sanger sequencing and Oxford Nanopore.** Oxford Nanopore (ONP) repeat sizes follow a wide distribution and we use the median of a distinctive peak to represent the allele size. lobSTR was run with parameters `--max-diff-ref 150 --realign --noise\_model illumina\_v3.pcrfree`. One SBMA tested sample was determined to be a *carrier* but had been included in the validation to test the existence of risk allele. ND: no data.

| Sample ID | Disorder                                               | Sanger | ONP   | lobSTR | Expansion-Hunter        | TREDPARSE               | TREDPARSE status                        |
|-----------|--------------------------------------------------------|--------|-------|--------|-------------------------|-------------------------|-----------------------------------------|
| 1         | [HD] - Huntington disease                              | 15/41  | 14/34 | 15/19  | 15/41                   | 15/41                   | Validated by Sanger                     |
| 2         | [HD] - Huntington disease                              | 21/41  | 18/33 | 19/21  | 21/54                   | 21/40                   | Validated by Sanger<br>(long allele -1) |
| 3         | [HD] - Huntington disease                              | 16/43  | 15/38 | 16/16  | 16/55                   | 16/44                   | Validated by Sanger<br>(long allele +1) |
| 4         | [HD] - Huntington disease                              | 25/40  | 19/37 | 19/25  | 25/40                   | 25/40                   | Validated by Sanger                     |
| 5         | [SBMA] - Spinal and bulbar muscular atrophy of Kennedy | 19/21  | 34/34 | 23/23  | 40/40                   | 40/40                   | Validated by ONP                        |
| 6         | [SBMA] - Spinal and bulbar muscular atrophy of Kennedy | 24/25  | 24/34 | 25/25  | 25/36<br>(risk carrier) | 25/36<br>(risk carrier) | Validated by ONP                        |
| 7         | [SCA1] - Spinocerebellar ataxia 1                      | 29/39  | ND    | 29/29  | 30/40                   | 29/39                   | Validated by Sanger                     |
| 8         | [SCA1] - Spinocerebellar ataxia 1                      | 30/39  | ND    | 30/39  | 31/40                   | 30/39                   | Validated by Sanger                     |

|    |                                     |       |       |       |       |       |                                      |
|----|-------------------------------------|-------|-------|-------|-------|-------|--------------------------------------|
| 9  | [SCA1] - Spinocerebellar ataxia 1   | 29/42 | ND    | 29/29 | 53/56 | 29/45 | Validated by Sanger (long allele +3) |
| 10 | [SCA2] - Spinocerebellar ataxia 2   | 22/39 | ND    | 22/22 | ND    | 22/39 | Validated by Sanger                  |
| 11 | [SCA8] - Spinocerebellar ataxia 8   | ND    | 14/80 | 15/15 | 14/62 | 15/84 | Validated by ONP                     |
| 12 | [SCA8] - Spinocerebellar ataxia 8   | 17/17 | 16/84 | 13/16 | 16/87 | 17/84 | Validated by ONP                     |
| 13 | [SCA17] - Spinocerebellar ataxia 17 | 38/46 | ND    | 38/38 | 38/45 | 38/46 | Validated by Sanger                  |
| 14 | [SCA17] - Spinocerebellar ataxia 17 | 37/43 | ND    | 37/43 | 37/43 | 37/43 | Validated by Sanger                  |
| 15 | [SCA17] - Spinocerebellar ataxia 17 | 38/43 | 35/40 | 26/38 | 38/43 | 38/43 | Validated by both                    |
| 16 | [SCA17] - Spinocerebellar ataxia 17 | 37/44 | ND    | 37/44 | 37/44 | 37/44 | Validated by Sanger                  |
| 17 | [SCA17] - Spinocerebellar ataxia 17 | 37/45 | 33/42 | 37/37 | 37/52 | 37/44 | Validated by both                    |
| 18 | [SCA17] - Spinocerebellar ataxia 17 | 36/43 | ND    | 36/43 | 36/43 | 36/43 | Validated by Sanger                  |
| 19 | [DM1] - Myotonic dystrophy 1        | 5/44+ | ND    | 5/5   | 58/67 | 5/53  | Validated by Sanger                  |

**Table S5. Number of spanning, partial, repeat-only, paired-end reads and STR calls identified by TREDPARSE for each of the trio families used in the Mendelian error estimates.** Each worksheet contains a single STR locus. STR calls are in the form of “X | Y” for autosomal loci, and “X | .” for male individuals called at X-linked loci to indicate hemizyosity. Rows highlighted in green for “Correct”, red for “Error” and yellow for “Missing”.

**[See EXCEL file Table-S5.xlsx]**
